# Supplementary material for: A fucose containing polymer-rich fraction from the brown alga Ascophyllum nodosum mediates lifespan increase and thermal-tolerance in Caenorhabditis elegans, by differential effects on gene and protein expression
Source: Royal Society of Chemistry journal article supplement (doi:10.1039/c3fo60050e), 2013-10-31
Supplement: c3fo60050e.pdf [file c3fo60050e.pdf]

**Supplementary table 1** Proteins that were most differentially expressed (up/down) in FCP-treated *C. elegans* under 35°C stress.

| ID Number <sup>a</sup>                        | Name of Protein                                                                            | Accession Number | Fold difference <sup>b</sup> | ~Molecular Mass (Da) | ~ pI | Coverage (%) | Matched Peaks | Putative Functions                                                                                                                                           |
|-----------------------------------------------|--------------------------------------------------------------------------------------------|------------------|------------------------------|----------------------|------|--------------|---------------|--------------------------------------------------------------------------------------------------------------------------------------------------------------|
| <b>Up regulated proteins due to treatment</b> |                                                                                            |                  |                              |                      |      |              |               |                                                                                                                                                              |
| 1                                             | IPYR_CAEEL Probable inorganic pyrophosphatase 1 OS= <i>Caenorhabditiselegans</i> GN=pyp/   | IPYR             | 1.32                         | 44,133.7             | 4.83 | 20.1         | 8             | Embryo development, egg hatching and growth                                                                                                                  |
| 2                                             | PSA2_CAEEL Proteasome subunit alpha type-2 OS= <i>Caenorhabditiselegans</i> GN=pas-2 PE    | PSA2             | 1.41                         | 25,318.1             | 5.85 | 3.9          | 1             | The proteasome is a multicatalytic proteinase complex which is characterized by its ability to cleave peptides. It has an ATP-dependent proteolytic activity |
| 3                                             | SAR1_CAEEL GTP-binding protein SAR1 OS= <i>Caenorhabditiselegans</i> GN=ZK180.4 PE=2 SV    | SAR1             | 0.15                         | 21,691.4             | 5.61 | 9.84         | 2             | Embryo development ending in birth or egg hatching and growth                                                                                                |
| 4                                             | IF5A1_CAEEL Eukaryotic translation initiation factor 5A-1 OS= <i>Caenorhabditiselegans</i> | IF5A1            | D                            | 17,849.3             | 5.23 | 11.8         | 2             | mRNA-binding protein involved in translation elongation, stress response and maintenance of cell wall integrity.                                             |
| 5                                             | RHO1_CAEEL Ras-like GTP-binding protein rhoA OS= <i>Caenorhabditis elegans</i> GN          | RHO1             | 1.25                         | 21,617.4             | 4.31 | 3.12         | 1             | Regulation of acetylcholine secretion and locomotion and involved in small GTPase mediated signal transduction                                               |
| 6                                             | TDX1_CAEEL Probable                                                                        | TDX1             | 0.25                         | 24,914.8             | 6.13 | 31.9         | 8             | Plays an important role in                                                                                                                                   |

|    |                                                                                                            |                |      |          |      |      |   |  |                                                                                                                           |
|----|------------------------------------------------------------------------------------------------------------|----------------|------|----------|------|------|---|--|---------------------------------------------------------------------------------------------------------------------------|
|    | peroxiredoxin prdx-3<br>OS= <i>Caenorhabditiselegans</i><br>GN                                             |                |      |          |      |      |   |  | eliminating peroxides generated during metabolism.                                                                        |
| 7  | NAS16_CAEEL Zinc metalloproteinase nas-16<br>OS= <i>Caenorhabditis elegans</i><br>GN                       | NAS16          | 2.24 | 51,491.4 | 5.61 | 2.22 | 1 |  | Hydrolysis the proteins into smaller polypeptides and/or amino acids by cleavage of their peptide bonds.                  |
| 8  | Q9XVT2_CAEEL Protein C15C6.3, partially confirmed by transcript evidence<br>OS=Caen                        | Q9XVT2         | D    | 77,550.3 | 5.51 | 1.14 | 1 |  | Hermaphrodite genitalia development, mRNA cleavage and positive regulation of growth rate                                 |
| 9  | GPX2_CAEEL Probable glutathione peroxidase R05H-10.5<br>OS= <i>Caenorhabditis elegans</i><br>GN            | O62327         | D    | 18,134.3 | 6.75 | 10.4 | 2 |  | Response to oxidative stress, glutathione peroxidase activity                                                             |
| 10 | TPIS_CAEEL Triosephosphateisomerase<br>OS= <i>Caenorhabditiselegans</i><br>GN=tpi-1 PE=1 SV                | TPIS           | 0.29 | 26,556.4 | 6.56 | 4.05 | 1 |  | Determination of adult lifespan and fatty acid biosynthetic process                                                       |
| 11 | O62040_CAEEL Putative uncharacterized protein<br>OS= <i>Caenorhabditiselegans</i>                          | O44751         | D    | 37,708   | 5.48 | 2.37 | 1 |  | Strictosidine synthase (a key enzyme in alkaloid biosynthesis) activity                                                   |
| 12 | Q9N5D3_CAEEL Drosophila sos homolog protein 1<br>OS= <i>Caenorhabditis elegans</i><br>GN=SOS-1             | Q9N5D3, Q9NBD3 | D    | 16,902   | 5.67 | 0.47 | 1 |  | DNA binding, Rho guanyl-nucleotide exchange factor activity, calmodulin binding                                           |
| 13 | AL7A1_CAEEL Putative aldehyde dehydrogenase family 7 member A1 homolog<br>OS= <i>Caenorhabditiselegans</i> | P46562         | D    | 56,994.8 | 6.43 | 4.52 | 3 |  | Detoxification of aldehydes generated by alcohol metabolism and lipid peroxidation, protects cells from oxidative stress. |
| 14 | RSSA_CAEEL 40S                                                                                             | P46769         | D    | 30,685.1 | 6.12 | 6.16 | 2 |  | Assembly and/or stability of the                                                                                          |

|    |                                                                                                             |                        |      |          |      |      |   |  |                                                                                                                                              |
|----|-------------------------------------------------------------------------------------------------------------|------------------------|------|----------|------|------|---|--|----------------------------------------------------------------------------------------------------------------------------------------------|
|    | ribosomal protein SA<br>OS= <i>Caenorhabditis elegans</i><br>GN=RPS-0 PE=1 SV=3                             |                        |      |          |      |      |   |  | 40S ribosomal subunit and processing of the 20S rRNA-precursor to mature 18S rRNA in a late step of the maturation of 40S ribosomal subunits |
| 15 | Q9XW04_CAEEL Protein Y18D10A.21, partially confirmed by transcript evidence OS=C                            | Q9XW04                 | D    | 32,897.3 | 6.47 | 2.8  | 1 |  | Catalytic activity, cation-binding, carbohydrate metabolic process                                                                           |
| 16 | Q94255_CAEEL Saposin-like protein family protein 20                                                         | Q94255                 | D    | 24,484.9 | 5.87 | 2.76 | 1 |  | Lipid metabolism                                                                                                                             |
| 17 | Q17849_CAEEL Heat shock protein protein 25, isoform a OS= <i>Caenorhabditiselegans</i>                      | Q17849                 | D    | 25,238.6 | 5.91 | 4.57 | 1 |  | Response to heat, protein-binding, Stress response                                                                                           |
| 18 | D0LGS3_HALO1 Carbamoyl-phosphate synthase L chain ATP-binding protein OS=Haliang                            | D0LGS3                 | 1.89 | 211,022  | 5.43 | 0.47 | 1 |  | ATP-binding, biotin-binding, ligase activity                                                                                                 |
| 19 | C3JZ86_PSEFS Superoxide dismutase OS                                                                        | C3JZ86, Q1IE87, Q3K7N1 | D    | 22,743.6 | 4.52 | 4.57 | 1 |  | Superoxide dismutase activity, oxidation reduction, superoxide metabolic process                                                             |
| 20 | Q18100_CAEEL Sensory axon guidance protein 7                                                                | Q18100, Q4PIU9         | D    | 127,605  | 5.61 | 0.61 | 1 |  | Involved in specific pathways by attractive and repulsive cues in the extracellular environment                                              |
| 21 | Q6EUT7_CAEEL Protein ZK1151.1g, partially confirmed by transcript evidence OS= <i>Caenorhabditiselegans</i> | Q7K7B6, Q867D9         | 1.88 | 561,703  | 4.41 | 0.2  | 1 |  | Cell cycle arrest, Actin-binding and Calcium ion-binding                                                                                     |
| 22 | 14331_CAEEL 14-3-3-like protein 1 OS= <i>Caenorhabditiselegans</i> GN=PAR-5 PE=1 SV=2 6                     | Q20655 P41932          | 1.52 | 28,173   | 4.52 | 10.1 | 3 |  | Adapter protein involved in regulation of general and specialized signaling pathway                                                          |

|    |                                                                                                               |                   |       |          |      |      |    |                                                                                                         |
|----|---------------------------------------------------------------------------------------------------------------|-------------------|-------|----------|------|------|----|---------------------------------------------------------------------------------------------------------|
| 23 | MLR1_CAEEL Myosin regulatory light chain 1<br>OS= <i>Caenorhabditiselegans</i><br>GN=MLC-1 PE                 | P19625,<br>P19626 | 4.9   | 8,586.4  | 4.52 | 31.2 | 15 | Calcium ion-binding, motor activity                                                                     |
| 24 | HSP11_CAEEL Heat shock protein HSP-16.1/HSP-16.11<br>OS= <i>Caenorhabditiselegans</i><br>GN=h                 | P34696            | D     | 16,235.5 | 6.30 | 33.8 | 6  | Defense response, determination of adult lifespan, positive regulation of growth rate, response to heat |
| 25 | COX5A_CAEEL Cytochrome c oxidase subunit 5A, mitochondrial<br>OS= <i>Caenorhabditis elegans</i>               | P55954            | D     | 20,093.3 | 6.23 | 13.8 | 4  | Cytochrome-c oxidase activity, metal ion binding                                                        |
| 26 | O45509_CAEEL Protein F41D3.10, partially confirmed by transcript evidence<br>OS= <i>Caenorhabditiselegans</i> | O45509            | D     | 76,674   | 6.51 | 1.19 | 1  | Sequence-specific DNA-binding, steroid hormone receptor activity, zinc ion-binding                      |
| 27 | Q9UAX1_CAEEL Putative uncharacterized protein T12B3.4<br>OS= <i>Caenorhabditiselegans</i>                     | Q9UAX1            | D     | 33,698.7 | 6.71 | 2.74 | 2  | Protein-binding                                                                                         |
| 28 | O18180_CAEEL Protein W09D10.3, confirmed by transcript evidence<br>OS= <i>Caenorhabditiselegans</i>           | O18180            | 2.36  | 18,421.4 | 6.63 | 16.8 | 5  | Determination of adult lifespan, positive regulation of growth rate, structural constituent of ribosome |
| 29 | O44751_CAEEL Putative uncharacterized protein<br>OS= <i>Caenorhabditiselegans</i>                             | O44751            | 2.02  | 55,504.4 | 6.27 | 1.23 | 1  | ATP-binding, protein kinase activity                                                                    |
| 30 | Q9XUT0_CAEEL Protein K08E3.4, confirmed by transcript evidence<br>OS= <i>Caenorhabditiselegans</i>            | Q9XUT0            | 11.14 | 71,922.8 | 6.85 | 3.11 | 2  | Actin-binding                                                                                           |
| 31 | O45177_CAEEL Putative                                                                                         | O45177            | 10.63 | 40,387   | 6.92 | 2.31 | 1  | RNA-binding                                                                                             |

|                                                 |                                                                                                     |                    |      |          |      |      |    |                                                                                                |  |
|-------------------------------------------------|-----------------------------------------------------------------------------------------------------|--------------------|------|----------|------|------|----|------------------------------------------------------------------------------------------------|--|
|                                                 | uncharacterized protein<br>OS= <i>Caenorhabditiselegans</i><br>GN=K07H8                             |                    |      |          |      |      |    |                                                                                                |  |
| 32                                              | C5I WV5_PIG Trypsinogen<br>OS= <i>Sus scrofa</i> PE=2 SV=1                                          | C5I WV5,<br>P00761 | 1.0  | 21,959.7 | 5.61 | 4.55 | 1  | Proteolysis, serine-type<br>endopeptidase activity                                             |  |
| 33                                              | ATPB_CAEEL ATP<br>synthase subunit beta,<br>mitochondrial<br>OS= <i>Caenorhabditiselegans</i><br>GN | P46561             | 1.59 | 57,509.3 | 4.73 | 1.86 | 1  | ATP-binding, hydrogen ion<br>transporting ATP synthase activity                                |  |
| 34                                              | Q21057_CAEEL Galectin<br>OS= <i>Caenorhabditis elegans</i><br>PE=2 SV=1 6239                        | Q21057,<br>Q9N384  | 3.79 | 15,911.4 | 4.42 | 26   | 4  | Sugar-binding                                                                                  |  |
| 35                                              | Q20804_CAEEL CNB-1<br>OS= <i>Caenorhabditis elegans</i><br>GN=CNB-1 PE=2<br>SV=3 6239               | Q20804             | 1.01 | 19,654.9 | 5.10 | 5.85 | 1  | Calcium ion-binding                                                                            |  |
| 36                                              | HSP17_CAEEL Heat shock<br>protein HSP-16.48/HSP-<br>16.49<br>OS= <i>Caenorhabditiselegans</i><br>GN | P02513             | 8.43 | 16,282   | 5.83 | 11.2 | 2  | Determination of adult lifespan,<br>endoplasmic reticulum unfolded<br>protein response to heat |  |
| <b>Down regulated proteins due to treatment</b> |                                                                                                     |                    |      |          |      |      |    |                                                                                                |  |
| 37                                              | MLE_CAEEL Myosin,<br>essential light chain<br>OS= <i>Caenorhabditiselegans</i><br>GN=mlc-3 PE=1     | P19625,<br>P19626  | 0.75 | 17,127.1 | 5.27 | 76.5 | 14 | Locomotion and all cellular and<br>reproductive activity                                       |  |
| 38                                              | Q22066_CAEEL Aspartate<br>aminotransferase<br>OS= <i>Caenorhabditis elegans</i><br>GN=T01Cf8.4 PE   | Q22066             | 0.37 | 15,266.2 | 4.42 | 2.24 | 1  | Biosynthetic process and cellular<br>amino acid metabolic process                              |  |

|    |                                                                                                           |                |      |          |      |      |   |                                                                                                       |
|----|-----------------------------------------------------------------------------------------------------------|----------------|------|----------|------|------|---|-------------------------------------------------------------------------------------------------------|
| 39 | Q20644_CAEEL Protein F52B5.3, partially confirmed by transcript evidence OS= <i>Caenorhabditiselegans</i> | Q20644         | D    | 162,454  | 6.53 | 0.7  | 1 | Inorganic anion exchanger activity                                                                    |
| 40 | EIF3C_CAEEL Eukaryotic translation initiation factor 3 subunit C OS= <i>Caenorhabditiselegans</i>         | P34563         | D    | 103,827  | 6.45 | 0.67 | 1 | Protein synthesis, translation initiation factor activity                                             |
| 41 | RL18_CAEEL 60S ribosomal protein L18 OS= <i>Caenorhabditis elegans</i> GN=RPL-18 PE=3 SV                  | O45946         | 0.30 | 51,385.2 | 6.73 | 3.72 | 1 | RNA-binding, Structural constituent of ribosome                                                       |
| 42 | Q23440_CAEEL Protein ZK1307.8, confirmed by transcript evidence OS= <i>Caenorhabditiselegans</i>          | A8DYR6, Q8IG31 | 0.46 | 58,045.8 | 4.81 | 1.38 | 1 | Calcium ion-binding, protein-binding,                                                                 |
| 43 | A8DYR6_CAEEL Peroxiredoxin protein 2, isoform b OS= <i>Caenorhabditis elegans</i> GN                      | A8DYR6, Q8IG31 | 0.80 | 21,767   | 5.45 | 14.9 | 3 | Thioredoxin peroxidase activity, determination of adult lifespan, hydrogen peroxide catabolic process |

D –Differential protein. These specified differential proteins were found to be expressed due to FCP treatment under stressed conditions, includes both up/down regulation; a) ID number indicates the excised differential protein spot from the 2-DE master reference gel; b) The mean (n = 6) factor of increase/decrease in protein spot due to FCP treatment compared to control *C. elegans* worm proteome, obtained from the 6 replicate gels (3 biological and 3 technical replicates). The ‘P’ value of each differential spot was  $\leq 0.05$ .
