# Supplementary figures and images for: A fucose containing polymer-rich fraction from the brown alga Ascophyllum nodosum mediates lifespan increase and thermal-tolerance in Caenorhabditis elegans, by differential effects on gene and protein expression
Source: Royal Society of Chemistry journal article supplement (doi:10.1039/c3fo60050e), 2013-10-31

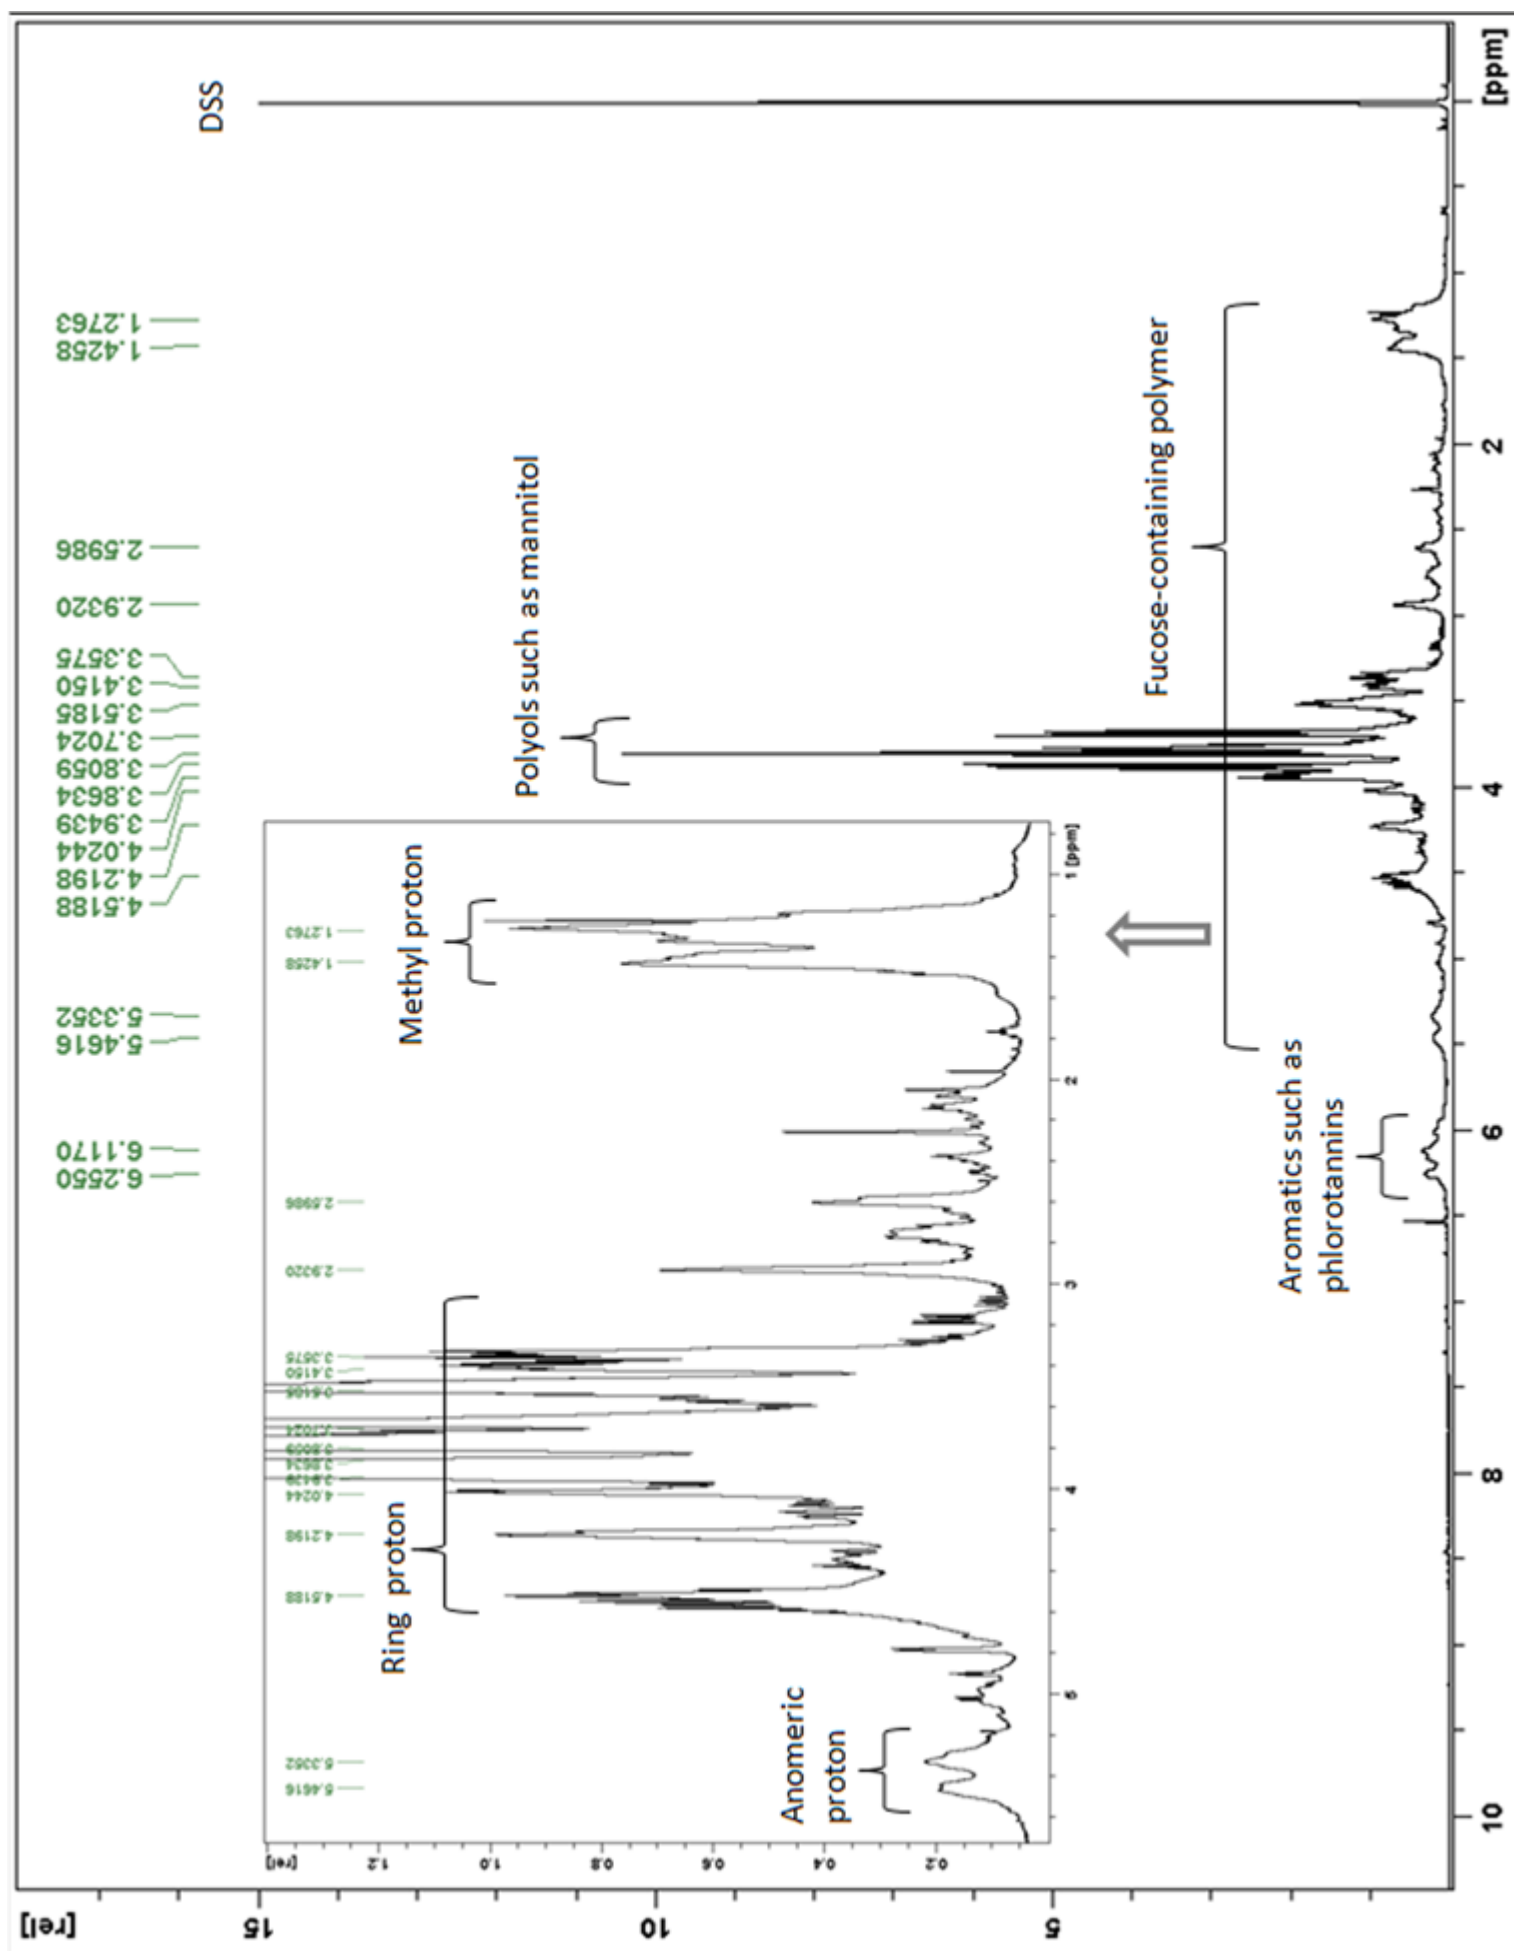

Supplement: c3fo60050e_2.pdf [file c3fo60050e_2.pdf]
